# Supplementary material for: Analyzing somatic mutations by single-cell whole-genome sequencing
Source: Springer Nature journal article supplement (doi:10.1038/s41596-023-00914-8), 2023-11-23
Supplement: MOESM1 [file 41596_2023_914_MOESM1_ESM13.xlsx]

## Sheet: Table S1
Supplementary Table 1. Depth and Coverage of whole-genome sequencing after SCMDA as compared to bulk sequencing.
Sample	Depth (reads with ≥40 mapQ)	% of genome covered with depth						Notes
		≥5x	≥10x	≥15x	≥20x	≥25x	≥30x
C151223_S1	27.3062	0.860558	0.775201	0.661091	0.543324	0.437131	0.347827	Single cell
C151223_S2	27.383	0.818709	0.705235	0.59074	0.488156	0.401126	0.329252	Single cell
C151223_S3	26.5556	0.840552	0.730867	0.605719	0.48999	0.392835	0.314774	Single cell
C151223_S4	30.6762	0.850414	0.758719	0.650655	0.545545	0.452574	0.374186	Single cell
C70007_S1	29.9231	0.705687	0.603	0.520068	0.449773	0.389582	0.338068	Single cell
C70007_S3	27.9879	0.839872	0.74047	0.62755	0.519666	0.425207	0.346435	Single cell
C70007_S5	24.987	0.831583	0.698367	0.55688	0.43727	0.34407	0.273284	Single cell
C70007_S10	24.4766	0.770267	0.636809	0.518826	0.420662	0.341422	0.278227	Single cell
CB151223_gDNA	29.858	0.896781	0.892813	0.888017	0.873873	0.809419	0.630241	Bulk DNA
CB70007_gDNA	25.8066	0.895969	0.891157	0.880503	0.827594	0.658968	0.389529	Bulk DNA

## Sheet: Table S2
Supplementary Table 2. SNV calling sensitivity of SCMDA and SCcaller.
Sample	Depth (reads with ≥40 mapQ)	SNV calling sensitivity*						Notes
		≥5x	≥10x	≥15x	≥20x	≥25x	≥30x
C151223_S1	27.3062	0.86023	0.86023	0.855107	0.855743	0.858676	0.862761	Single cell
C151223_S2	27.383	0.820453	0.820453	0.815753	0.815215	0.816098	0.817942	Single cell
C151223_S3	26.5556	0.842747	0.842747	0.836493	0.835961	0.837724	0.841074	Single cell
C151223_S4	30.6762	0.790792	0.790792	0.785983	0.784611	0.784886	0.785666	Single cell
C70007_S1	29.9231	0.678647	0.678647	0.684025	0.690655	0.697501	0.703828	Single cell
C70007_S3	27.9879	0.828316	0.828316	0.824772	0.824754	0.826749	0.829515	Single cell
C70007_S5	24.987	0.858376	0.858376	0.849464	0.848521	0.850061	0.852125	Single cell
C70007_S10	24.4766	0.784202	0.784202	0.781164	0.780184	0.779451	0.779319	Single cell
*Estimated as the fraction of known germline heterozygous SNPs that can be called from the single-cell data.

## Sheet: Table S3
Supplementary Table 3. False positive per base pair in SNV calling of SCMDA and SCcaller.
Sample	Depth (reads with ≥40 mapQ)	False positive per base pair in SNV calling*						Notes
		≥5x	≥10x	≥15x	≥20x	≥25x	≥30x
C151223_S1	27.3062	4.84799e-08	5.3818e-08	4.91371e-08	4.572e-08	4.44415e-08	4.02865e-08	Single cell
C151223_S2	27.383	6.57396e-08	7.63174e-08	7.27792e-08	7.11112e-08	7.0661e-08	6.57735e-08	Single cell
C151223_S3	26.5556	9.58576e-08	1.10243e-07	1.02526e-07	9.42434e-08	9.40413e-08	8.90336e-08	Single cell
C151223_S4	30.6762	1.27701e-07	1.43134e-07	1.38518e-07	1.29013e-07	1.21738e-07	1.14899e-07	Single cell
C70007_S1	29.9231	6.58887e-08	7.71092e-08	6.67477e-08	5.52296e-08	5.31355e-08	4.33335e-08	Single cell
C70007_S3	27.9879	7.43213e-08	8.42983e-08	7.5615e-08	7.29277e-08	6.74082e-08	6.15918e-08	Single cell
C70007_S5	24.987	5.66795e-08	6.74914e-08	6.23355e-08	5.97221e-08	5.55361e-08	5.12755e-08	Single cell
C70007_S10	24.4766	8.31046e-08	1.00521e-07	1.03737e-07	1.03719e-07	9.98074e-08	9.84395e-08	Single cell
*Estimated as the frequency of unique SNVs called from the single-cell data. All single cells here are from cord blood, and should have the lowest somatic mutation burden across the entire human lifespan. Still, this estimation significantly over estimates the false positive rate, because this call set includes both true somatic mutations and false positives.

## Sheet: Table S4
Supplementary Table 4. INDEL calling sensitivity of SCMDA and SCcaller.
Sample	Depth (reads with ≥40 mapQ)	INDEL calling sensitivity*						Notes
		≥5x	≥10x	≥15x	≥20x	≥25x	≥30x
C151223_S1	27.3062	0.495395	0.495395	0.535148	0.574815	0.608453	0.63839	Single cell
C151223_S2	27.383	0.506323	0.506323	0.546477	0.579109	0.605983	0.624979	Single cell
C151223_S3	26.5556	0.486977	0.486977	0.530752	0.570454	0.602164	0.627026	Single cell
C151223_S4	30.6762	0.48509	0.48509	0.520018	0.553961	0.580762	0.601051	Single cell
C70007_S1	29.9231	0.492354	0.492354	0.533293	0.562207	0.584908	0.602615	Single cell
C70007_S3	27.9879	0.510394	0.510394	0.548041	0.582557	0.609684	0.633542	Single cell
C70007_S5	24.987	0.477001	0.477001	0.524224	0.569125	0.601423	0.62803	Single cell
C70007_S10	24.4766	0.507346	0.507346	0.550104	0.582563	0.607133	0.624358	Single cell
*Estimated as the fraction of known germline heterozygous INDELs that can be called from the single-cell data.

## Sheet: Table S5
Supplementary Table 5. False positive per base pair in INDEL calling of SCMDA and SCcaller.
Sample	Depth (reads with ≥40 mapQ)	False positive per base pair in INDEL calling*						Notes
		≥5x	≥10x	≥15x	≥20x	≥25x	≥30x
C151223_S1	27.3062	1.4803e-09	1.6433e-09	1.92694e-09	1.75846e-09	1.4571e-09	1.83121e-09	Single cell
C151223_S2	27.383	1.16698e-09	1.35475e-09	1.07821e-09	6.52396e-10	7.93943e-10	9.67258e-10	Single cell
C151223_S3	26.5556	1.89442e-09	2.17872e-09	2.1031e-09	2.59982e-09	1.6214e-09	1.01175e-09	Single cell
C151223_S4	30.6762	4.11939e-09	4.61724e-09	4.40517e-09	5.25391e-09	6.3332e-09	5.10662e-09	Single cell
C70007_S1	29.9231	4.96422e-09	5.8096e-09	3.67419e-09	3.54036e-09	1.63494e-09	1.88407e-09	Single cell
C70007_S3	27.9879	3.41271e-09	3.87084e-09	3.0449e-09	3.06419e-09	2.99592e-09	3.67712e-09	Single cell
C70007_S5	24.987	1.14891e-09	1.36807e-09	1.14377e-09	1.45664e-09	9.25602e-10	1.16535e-09	Single cell
C70007_S10	24.4766	3.7211e-09	4.50094e-09	4.29682e-09	3.02829e-09	3.73112e-09	4.57858e-09	Single cell
*Estimated as the frequency of unique SNVs called from the single-cell data. All single cells here are from cord blood, and should have the lowest somatic mutation burden across the entire human lifespan. Still, this estimation significantly over estimates the false positive rate, because this call set includes both true somatic mutations and false positives.
